# Supplementary material for: Experiences of Using a Digital Guidance and Assessment Tool (the Technology-Optimized Practice Process in Nursing Application) During Clinical Practice in a Nursing Home: Focus Group Study Among Nursing Students
Source: PubMed Central journal article supplement (PMC11422751; doi:10.2196/48810), 2024-09-10
Supplement: nursing_v7i1e48810_app1.pdf [file nursing_v7i1e48810_app1.pdf]

## Multimedia Appendix 1

### Manuscript: Nursing Students' Experiences of Using the digital Guidance and Assessment Tool TOPP-N during Clinical Practice in a Nursing Home: A Qualitative Study

#### Consolidated criteria for reporting qualitative studies (COREQ): 32-item Checklist

Developed from:

Tong A, Sainsbury P, Craig J. Consolidated criteria for reporting qualitative research (COREQ): a 32-item checklist for interviews and focus groups. *International Journal for Quality in Health Care*. 2007. Volume 19, Number 6: pp. 349 – 357

| No. Item                                       | Guide questions/Description                                                                                                               | Reported on Page #                                                                           |
|------------------------------------------------|-------------------------------------------------------------------------------------------------------------------------------------------|----------------------------------------------------------------------------------------------|
| <b>Domain 1: Research team and reflexivity</b> |                                                                                                                                           |                                                                                              |
| <i>Personal Characteristics</i>                |                                                                                                                                           |                                                                                              |
| 1. Interviewer/facilitator                     | Which author/s conducted the interview or focus group?                                                                                    | Page 8                                                                                       |
| 2. Credentials                                 | What were the researcher's credentials? e.g. PhD, MD                                                                                      | On the title page                                                                            |
| 3. Occupation                                  | What was their occupation at the time of the study?                                                                                       | Page 25                                                                                      |
| 4. Gender                                      | Was the researcher male or female?                                                                                                        | Page 25                                                                                      |
| 5. Experience and training                     | What experience or training did the researcher have?                                                                                      | Page 25                                                                                      |
| <i>Relationship with participants</i>          |                                                                                                                                           |                                                                                              |
| 6. Relationship established                    | Was a relationship established prior to study commencement?                                                                               | Page 9                                                                                       |
| 7. Participant knowledge of the interviewer    | What did the participants know about the researcher? e.g. personal goals, reasons for doing the research                                  | All participants received written information about the study before they gave their consent |
| 8. Interviewer characteristics                 | What characteristics were reported about the interviewer/facilitator? e.g. Bias, assumptions, reasons and interests in the research topic | Page 25                                                                                      |

|                                          |                                                                                                                                                          |                                   |
|------------------------------------------|----------------------------------------------------------------------------------------------------------------------------------------------------------|-----------------------------------|
| <b>Domain 2: study design</b>            |                                                                                                                                                          |                                   |
| <i>Theoretical framework</i>             |                                                                                                                                                          |                                   |
| 9. Methodological orientation and Theory | What methodological orientation was stated to underpin the study? e.g. grounded theory, discourse analysis, ethnography, phenomenology, content analysis | Page 7                            |
| <i>Participant selection</i>             |                                                                                                                                                          |                                   |
| 10. Sampling                             | How were participants selected? e.g. purposive, convenience, consecutive, snowball                                                                       | Page 7-8                          |
| 11. Method of approach                   | How were participants approached? e.g. face-to-face, telephone, mail, email                                                                              | Page 7-8                          |
| 12. Sample size                          | How many participants were in the study?                                                                                                                 | Page 7 and 9 and Table 3 (page 9) |
| 13. Non-participation                    | How many people refused to participate or dropped out? Reasons?                                                                                          | Page 7-8                          |
| <i>Setting</i>                           |                                                                                                                                                          |                                   |
| 14. Setting of data collection           | Where was the data collected? e.g. home, clinic, workplace                                                                                               | Page 8                            |
| 15. Presence of non-participants         | Was anyone else present besides the participants and researchers?                                                                                        | Page 8                            |
| 16. Description of sample                | What are the important characteristics of the sample? e.g. demographic data, date                                                                        | Page 7 and 9 and Table 3 (page 9) |
| <i>Data collection</i>                   |                                                                                                                                                          |                                   |
| 17. Interview guide                      | Were questions, prompts, guides provided by the authors? Was it pilot tested?                                                                            | Page 8 and Appendix 2             |
| 18. Repeat interviews                    | Were repeat interviews carried out? If yes, how many?                                                                                                    | No                                |
| 19. Audio/visual recording               | Did the research use audio or visual recording to collect the data?                                                                                      | Page 8                            |

|                                        |                                                                                                                                 |                                                        |
|----------------------------------------|---------------------------------------------------------------------------------------------------------------------------------|--------------------------------------------------------|
| 20. Field notes                        | Were field notes made during and/or after the interview or focus group?                                                         | No                                                     |
| 21. Duration                           | What was the duration of the interviews or focus group?                                                                         | Page 8                                                 |
| 22. Data saturation                    | Was data saturation discussed?                                                                                                  | Page 24-25                                             |
| 23. Transcripts returned               | Were transcripts returned to participants for comment and/or correction?                                                        | No                                                     |
| <b>Domain 3: analysis and findings</b> |                                                                                                                                 |                                                        |
| <i>Data analysis</i>                   |                                                                                                                                 |                                                        |
| 24. Number of data coders              | How many data coders coded the data?                                                                                            | Page 8 and 25                                          |
| 25. Description of the coding tree     | Did authors provide a description of the coding tree?                                                                           | Page 8 and Table 2 page 9                              |
| 26. Derivation of themes               | Were themes identified in advance or derived from the data?                                                                     | Page 8, 25 and Table 2 (page 9) and Table 4 (page 11)  |
| 27. Software                           | What software, if applicable, was used to manage the data?                                                                      | Not applicable                                         |
| 28. Participant checking               | Did participants provide feedback on the findings?                                                                              | No                                                     |
| <i>Reporting</i>                       |                                                                                                                                 |                                                        |
| 29. Quotations presented               | Were participant quotations presented to illustrate the themes/findings? Was each quotation identified? e.g. participant number | Page 11-19                                             |
| 30. Data and findings consistent       | Was there consistency between the data presented and the findings?                                                              | Page 11-19, and Table 2 (page 9) and Table 4 (page 11) |
| 31. Clarity of major themes            | Were major themes clearly presented in the findings?                                                                            | Page 11-19, and Table 4 (page 11)                      |
| 32. Clarity of minor themes            | Is there a description of diverse cases or discussion of minor themes?                                                          | Page 11-19, and Table 2 (page 9) and Table 4 (page 11) |
